# Supplementary material for: Reduction of double-strand DNA break repair exacerbates vascular aging
Source: publisher site journal article supplement (doi:10.18632/aging.205066), 2023-10-02
Supplement: Supplementary file [file aging-v15i19-205066-supplementary-material-SD1.pdf]

SUPPLEMENTARY FIGURE

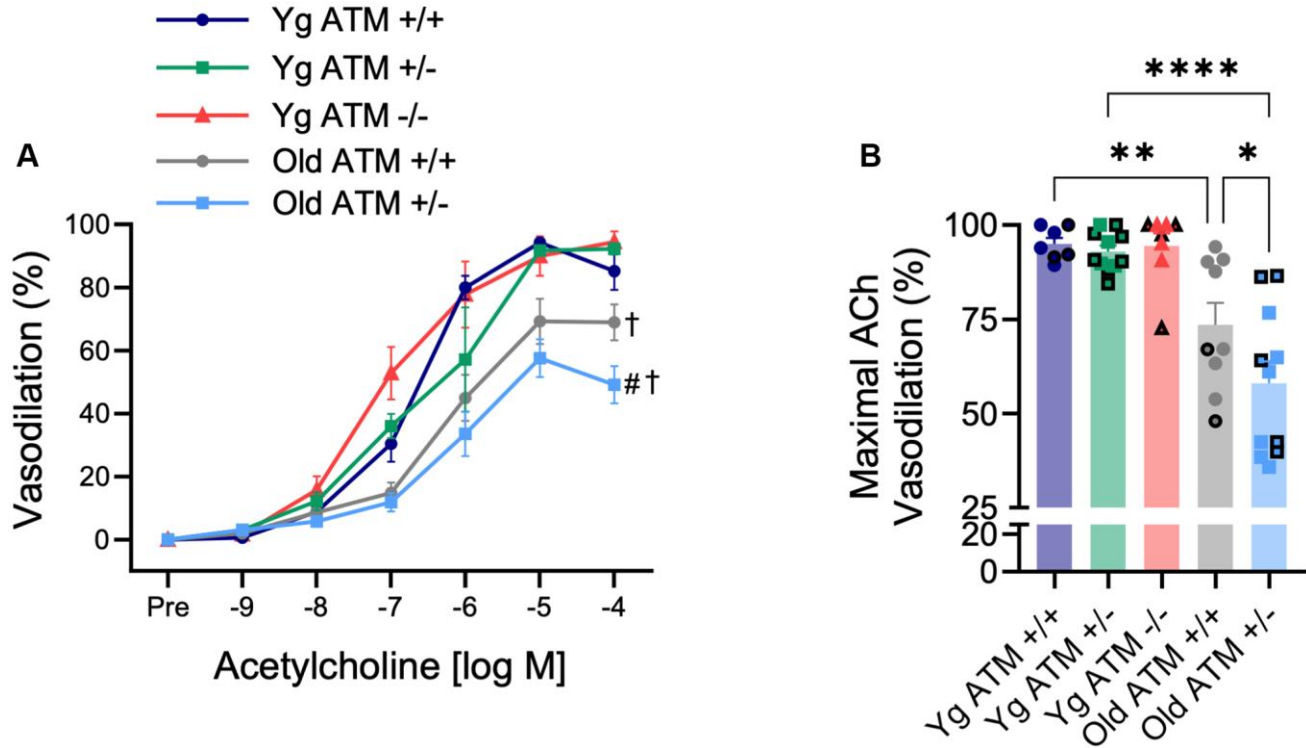

**Supplementary Figure 1. Impact of aging and reduced double-strand DNA break repair on endothelium-dependent vasodilation.** (A) Mesenteric artery dose-response curves to increasing doses of the endothelium-dependent vasodilator acetylcholine.  $N = 7-11$  per group. (B) Maximal acetylcholine (ACh) vasodilation in mesenteric arteries.  $N = 7-11$  per group. Individual data points with black borders denote female mice. Individual data points matching group colors denote male mice.  $\#p < 0.05$  vs. Old ATM +/+ Acetylcholine dose-response curve in the absence of L-NAME.  $^{\dagger}p < 0.05$  vs. Yg mouse Acetylcholine dose-response curve from the same genotype.  $^*p < 0.05$ ,  $^{**}p < 0.01$ ,  $^{****}p < 0.0001$ .
