# Supplementary material for: Reduction of double-strand DNA break repair exacerbates vascular aging
Source: publisher site journal article supplement (doi:10.18632/aging.205066), 2023-10-02
Supplement: Supplementary file [file aging-v15i19-205066-supplementary-material-SD2.pdf]

## SUPPLEMENTARY TABLE

Supplementary Table 1. Primer sequences for RT-qPCR.

| Genes           | Forward                       | Reverse                      |
|-----------------|-------------------------------|------------------------------|
| <i>18s</i>      | 5'-TAGAGGGACAAGTGGCGTTC-3'    | 5'-CGCTGAGCCAGTCAGTGT-3'     |
| <i>atm</i>      | 5'-AGGCTGTTGGAAGCTGCTGG-3'    | 5'-CTAGTAATGGGTTGTAACATC-3'  |
| <i>trp53</i>    | 5'-CTCTCCCCCGCAAAGAAAAA-3'    | 5'-CGGAACATCTCGAAGCGTTTA-3'  |
| <i>cdkn2a</i>   | 5'-CGCAGGTTCTTGGTCACTGT-3'    | 5'-TGTTACAGAAAGCCAGAGCG-3'   |
| <i>cdkn1a</i>   | 5'-CCTGGTGATGTCCGACCTG-3'     | 5'-CCATGAGCGCATCGCAATC-3'    |
| <i>serpine1</i> | 5'-GACACCCTCAGCATGTTTCATC-3'  | 5'-AGGGTTGCACTAAACATGTCAG-3' |
| <i>col1a1</i>   | 5'-TAAGGGTCCCAATGGTGAGA-3'    | 5'-GGGTCCCTCGACTCCTACAT-3'   |
| <i>col3a1</i>   | 5'-GAGGGCCATAGCTGAACTGA-3'    | 5'-TGACTGTCCCACGTAAGCAC-3'   |
| <i>eln</i>      | 5'-TCCATCCGCCCTGGTTAT-3'      | 5'-TGGCAGTCTGGTCCTCTAAAG-3'  |
| <i>tgfb1</i>    | 5'-CTCCCGTGGCTTCTAGTGC-3'     | 5'-GCCTTAGTTTGGACAGGATCTG-3' |
| <i>mmp2</i>     | 5'-CAAGTTCCCCGGCGATGTC-3'     | 5'-TTCTGGTCAAGGTCACCTGTC-3'  |
| <i>mmp3</i>     | 5'-ACATGGAGACTTTGTCCCTTTTG-3' | 5'-TTGGCTGAGTGGTAGAGTCCC-3'  |
| <i>mmp9</i>     | 5'-CTGGACAGCCAGACACTAAAG-3'   | 5'-CTCGCGGCAAGTCTTCAGAG-3'   |
